# Supplementary material for: Tracing Back the History of Pepper (Capsicum annuum) in the Iberian Peninsula from a Phenomics Point of View
Source: MDPI journal article supplement (doi:10.3390/plants11223075), 2022-11-13
Supplement: s1 [file s1]

**Table S1:** Analysis of variance for conventional (FWE, FLP) and Tomato Analyzer descriptors among Mexico, Andean Region, Iberian Peninsula and Mediterranean Basin.

| Trait                         | Acronym | Sum of squares | Mean squares | F value <sup>†</sup> |
|-------------------------------|---------|----------------|--------------|----------------------|
| Fresh weight                  | FWE     | 134.02         | 44.67        | 66.13***             |
| Fruit pedicel lenght          | FPL     | 32.72          | 10.91        | 11.41***             |
| Perimeter                     | P       | 101.96         | 33.99        | 57.56***             |
| Area                          | A       | 140.84         | 46.95        | 51.13***             |
| Width mid-height              | WMH     | 152.56         | 50.86        | 98.22**              |
| Maximum width                 | MW      | 156.21         | 52.07        | 98.28***             |
| Height mid-width              | HMW     | 46.80          | 15.60        | 27.62***             |
| Maximum height                | MH      | 53.94          | 17.98        | 31.95***             |
| Curved height                 | CH      | 59.26          | 19.76        | 33.45***             |
| Fruit shape index external I  | FSIEI   | 37.89          | 12.63        | 36.90***             |
| Fruit shape index external II | FSIEII  | 27.09          | 9.03         | 29.63***             |
| Curved fruit shape index      | CFSI    | 25.06          | 8.36         | 29.41***             |
| Proximal fruit blockiness     | PFB     | 12.97          | 4.33         | 7.23***              |
| Distal fruit blockiness       | DFB     | 21.93          | 7.31         | 13.79***             |
| Fruit shape triangle          | FST     | 27.07          | 9.02         | 16.46***             |
| Ellipsoid                     | E       | 9.50           | 3.17         | 6.71***              |
| Circular                      | C       | 98.03          | 32.68        | 57.19***             |
| Rectangular                   | R       | 46.27          | 15.43        | 23.37***             |
| Shoulder height               | SH      | 14.84          | 4.95         | 7.03***              |
| Proximal angle micro          | PAMI    | 4.83           | 1.61         | 1.82 <sup>ns</sup>   |
| Proximal angle macro          | PAMA    | 89.37          | 29.79        | 33.85***             |
| Distal angle micro            | DAMI    | 18.00          | 6.00         | 7.34***              |
| Distal angle macro            | DAMA    | 46.94          | 15.65        | 20.52***             |
| Ovoid                         | Ov      | 19.82          | 6.61         | 10.08***             |
| V.Asymmetry                   | VAs     | 13.81          | 4.60         | 13.11***             |
| H.Asymmetry.Ov                | HAov    | 20.03          | 6.68         | 15.11***             |
| Width widest position         | WWP     | 12.77          | 4.26         | 7.59***              |
| Eccentricity                  | EC      | 30.23          | 10.08        | 16.19***             |
| Fruit shape index internal    | FSII    | 25.17          | 8.39         | 31.41***             |
| Eccentricity area index       | ECA     | 5.26           | 1.75         | 5.32**               |
| Lobedness degree              | LD      | 32.62          | 10.87        | 33.57***             |
| Pericarp area                 | PA      | 39.97          | 13.32        | 52.99***             |
| Pericarp thickness            | PT      | 14.09          | 4.70         | 10.40***             |
| Average Red                   | AR      | 23.51          | 7.84         | 9.64***              |
| Average Green                 | AG      | 6.54           | 2.18         | 2.29 <sup>ns</sup>   |
| Average Blue                  | AB      | 26.11          | 8.70         | 10.44***             |
| Average Luminosity            | AL      | 10.67          | 3.56         | 3.90**               |
| Average L Value               | ALV     | 11.03          | 3.68         | 4.04**               |
| Average a Value               | AaV     | 8.77           | 2.93         | 3.26*                |
| Average b Value               | AbV     | 52.87          | 17.62        | 23.81***             |
| Average Hue                   | AHue    | 4.81           | 1.60         | 1.76 <sup>ns</sup>   |
| Average Chroma                | ACh     | 45.81          | 15.27        | 23.15***             |

<sup>†</sup>,\*\*\*significant at  $p < 0.001$ , \*\*  $p < 0.01$ , \*  $p < 0.05$ , <sup>ns</sup> not significant

**Table S2:** Analysis of variance for conventional (FWE, FLP) and Tomato Analyzer descriptors among Iberian biogeographic provinces.

| Trait                         | Acronym | Sum of squares | Mean squares | F value <sup>†</sup> |
|-------------------------------|---------|----------------|--------------|----------------------|
| Fresh weight                  | FWE     | 40.83          | 5.83         | 7.72***              |
| Fruit pedicel lenght          | FPL     | 33.04          | 4.72         | 4.57***              |
| Perimeter                     | P       | 49.73          | 7.10         | 13.82***             |
| Area                          | A       | 84.52          | 12.07        | 12.85***             |
| Width mid-height              | WMH     | 18.93          | 2.71         | 5.33***              |
| Maximum width                 | MW      | 22.50          | 3.21         | 6.46***              |
| Height mid-width              | HMW     | 50.17          | 7.17         | 14.58***             |
| Maximum height                | MH      | 52.45          | 7.49         | 14.98***             |
| Curved height                 | CH      | 53.00          | 7.57         | 14.27***             |
| Fruit shape index external I  | FSIEI   | 8.90           | 1.27         | 4.71***              |
| Fruit shape index external II | FSIEII  | 4.68           | 0.67         | 3.08**               |
| Curved fruit shape index      | CFSI    | 4.24           | 0.61         | 3.17**               |
| Proximal fruit blockiness     | PFB     | 17.24          | 2.46         | 5.55***              |
| Distal fruit blockiness       | DFB     | 16.09          | 2.30         | 5.63***              |
| Fruit shape triangle          | FST     | 10.04          | 1.43         | 2.27*                |
| Ellipsoid                     | E       | 17.20          | 2.46         | 5.27***              |
| Circular                      | C       | 23.97          | 3.42         | 7.11***              |
| Rectangular                   | R       | 2.13           | 0.30         | 0.56 <sup>ns</sup>   |
| Shoulder height               | SH      | 18.58          | 2.65         | 4.44***              |
| Proximal angle micro          | PAMI    | 12.29          | 1.76         | 2.10*                |
| Proximal angle macro          | PAMA    | 15.54          | 2.22         | 2.21*                |
| Distal angle micro            | DAMI    | 24.14          | 3.45         | 4.91***              |
| Distal angle macro            | DAMA    | 26.27          | 3.75         | 4.88***              |
| Ovoid                         | Ov      | 23.02          | 3.29         | 6.20***              |
| V.Asymmetry                   | VAs     | 10.72          | 1.53         | 5.82***              |
| H.Asymmetry.Ov                | HAov    | 20.47          | 2.93         | 8.29***              |
| Width widest position         | WWP     | 19.32          | 2.76         | 5.85***              |
| Eccentricity                  | EC      | 27.36          | 3.91         | 4.04***              |
| Fruit shape index internal    | FSII    | 4.90           | 0.70         | 3.29**               |
| Eccentricity area index       | ECA     | 7.28           | 1.04         | 3.09**               |
| Lobedness degree              | LD      | 6.87           | 0.98         | 3.74**               |
| Pericarp area                 | PA      | 17.89          | 2.56         | 9.78***              |
| Pericarp thickness            | PT      | 33.19          | 4.74         | 7.58***              |
| Average Red                   | AR      | 74.35          | 10.62        | 18.04***             |
| Average Green                 | AG      | 43.19          | 6.17         | 6.93***              |
| Average Blue                  | AB      | 23.29          | 3.33         | 3.89***              |
| Average Luminosity            | AL      | 61.24          | 8.75         | 11.27***             |
| Average L Value               | ALV     | 66.16          | 9.45         | 12.70***             |
| Average a Value               | AaV     | 12.11          | 1.73         | 2.17*                |
| Average b Value               | AbV     | 61.69          | 8.81         | 14.93***             |
| Average Hue                   | AHue    | 16.10          | 2.30         | 2.92**               |
| Average Chroma                | ACh     | 49.92          | 7.13         | 12.50***             |

<sup>†</sup>\*\*\*significant at  $p < 0.001$ , \*\* $p < 0.01$ , \* $p < 0.05$ , <sup>ns</sup> not significant

**Table S3:** Analysis of variance for conventional and Tomato Analyzer descriptors between pungent and non-pungent peppers. Only the significantly different parameters are shown.

| Trait                         | Acronym | Pungent |        | Non-pungent |        | Sig.   |
|-------------------------------|---------|---------|--------|-------------|--------|--------|
|                               |         | Mean    | CV(%)  | Mean        | CV(%)  |        |
| Fresh weight                  | FWE     | 18.58   | 123.19 | 63.27       | 91.85  | <0.001 |
| Fruit pedicel lenght          | FPL     | 3.93    | 35.12  | 4.03        | 26.85  | <0.001 |
| Perimeter                     | P       | 205.10  | 60.51  | 254.21      | 34.81  | <0.001 |
| Area                          | A       | 1600.66 | 80.15  | 3029.77     | 56.58  | <0.001 |
| Width mid-height              | WMH     | 21.24   | 63.17  | 41.09       | 45.85  | <0.001 |
| Maximum width                 | MW      | 27.95   | 52.44  | 48.08       | 37.24  | <0.001 |
| Height mid-width              | HMW     | 72.70   | 67.47  | 79.66       | 45.08  | <0.001 |
| Maximum height                | MH      | 81.74   | 67.46  | 90.08       | 43.17  | <0.001 |
| Curved height                 | CH      | 83.11   | 65.62  | 93.08       | 41.59  | <0.001 |
| Fruit shape index external I  | FSIEI   | 3.07    | 54.17  | 2.12        | 50.25  | <0.001 |
| Fruit shape index external II | FSIEII  | 4.10    | 70.62  | 2.47        | 66.25  | <0.001 |
| Curved fruit shape index      | CFSI    | 4.72    | 71.11  | 2.91        | 69.05  | <0.001 |
| Ellipsoid                     | E       | 0.10    | 44.18  | 0.10        | 34.11  | 0.006  |
| Circular                      | C       | 0.31    | 42.83  | 0.25        | 45.40  | 0.001  |
| Rectangular                   | R       | 0.41    | 25.70  | 0.46        | 20.47  | <0.001 |
| Shoulder height               | SH      | 0.02    | 141.30 | 0.03        | 116.13 | <0.001 |
| Proximal angle micro          | PAMI    | 135.35  | 49.09  | 160.80      | 42.49  | <0.001 |
| V.Asymmetry                   | VAs     | 0.27    | 97.30  | 0.31        | 75.96  | <0.001 |
| H.Asymmetry.Ov                | HAov    | 1.06    | 97.32  | 1.00        | 78.51  | <0.001 |
| Eccentricity                  | EC      | 0.73    | 10.39  | 0.71        | 11.05  | <0.001 |
| Fruit shape index internal    | FSII    | 4.02    | 72.24  | 2.47        | 66.15  | <0.001 |
| Eccentricity area index       | ECA     | 0.48    | 14.76  | 0.48        | 13.84  | 0.003  |
| Lobedness degree              | LD      | 37.99   | 73.62  | 23.83       | 71.07  | 0.005  |
| Pericarp area                 | PA      | 0.40    | 15.87  | 0.37        | 15.65  | <0.001 |
| Pericarp thickness            | PT      | 0.21    | 15.81  | 0.20        | 16.11  | <0.001 |
| Average Red                   | AR      | 175.64  | 10.47  | 167.61      | 10.72  | <0.001 |
| Average Green                 | AG      | 90.37   | 29.50  | 83.41       | 20.84  | <0.001 |
| Average Luminosity            | AL      | 103.50  | 13.27  | 99.02       | 12.29  | 0.003  |
| Average L Value               | ALV     | 48.59   | 16.85  | 45.72       | 13.12  | <0.001 |
| Average b Value               | AbV     | 43.15   | 13.41  | 40.60       | 11.96  | <0.001 |
| Average Hue                   | AHue    | 57.75   | 17.33  | 55.90       | 10.92  | <0.001 |
| Average Chroma                | ACh     | 51.87   | 10.80  | 49.42       | 11.74  | <0.001 |

**Table S4** : Scores of each pepper accession for the first (PC1) and second (PC2) components after PCA analysis. P = pungent, NP = non-pungent, *na* = not available.

| Accession | Country  | Region            | Pungency  | PC1     | PC2     |
|-----------|----------|-------------------|-----------|---------|---------|
| C204      | Mexico   | Mexico            | P         | -0.9439 | -1.6398 |
| C87       | Mexico   | Mexico            | NP        | 0.4309  | -0.8216 |
| CGN21460  | Mexico   | Mexico            | P         | 0.5216  | -1.8411 |
| CGN21526  | Mexico   | Mexico            | NP        | 0.1372  | -1.2737 |
| CGN21527  | Mexico   | Mexico            | P         | 0.7564  | -1.4166 |
| CGN22102  | Mexico   | Mexico            | P         | 0.2853  | -0.7072 |
| CGN22783  | Mexico   | Mexico            | P         | -0.1551 | -1.8769 |
| CGN23254  | Mexico   | Mexico            | P         | -0.3293 | 0.1655  |
| CGN24355  | Mexico   | Mexico            | NP        | 1.6527  | -0.2887 |
| PM647     | Mexico   | Mexico            | P         | -0.0180 | -2.1073 |
| BGV005857 | Ecuador  | Andean Region     | NP        | 0.5611  | 0.0951  |
| BGV005981 | Ecuador  | Andean Region     | NP        | 0.1819  | 0.0278  |
| BGV006008 | Ecuador  | Andean Region     | NP        | -0.1033 | 0.0979  |
| BGV006055 | Ecuador  | Andean Region     | NP        | 0.6901  | -0.0095 |
| PI241670  | Ecuador  | Andean Region     | NP        | 2.4641  | -1.2090 |
| PI585238  | Ecuador  | Andean Region     | P         | 3.1917  | -1.5304 |
| PI585246  | Ecuador  | Andean Region     | P         | 0.4181  | -0.2001 |
| CGN20808  | Bolivia  | Andean Region     | P         | 0.0226  | -2.1433 |
| CGN22155  | Bolivia  | Andean Region     | NP        | 0.1256  | -0.8361 |
| PI213915  | Bolivia  | Andean Region     | NP        | 1.3633  | -1.0182 |
| PI439212  | Bolivia  | Andean Region     | P         | 1.6737  | -0.9516 |
| PI543188  | Bolivia  | Andean Region     | P         | -0.0477 | -0.3436 |
| BGV013687 | Peru     | Andean Region     | NP        | -0.2091 | -0.0468 |
| BGV013691 | Peru     | Andean Region     | NP        | 0.2316  | -0.3378 |
| CAP524    | Peru     | Andean Region     | P         | -0.3387 | -1.8026 |
| BGHZ0181  | Spain    | Iberian Peninsula | P         | -0.5887 | -0.2256 |
| BGHZ0284  | Spain    | Iberian Peninsula | P         | 2.5758  | -0.2153 |
| BGHZ1109  | Spain    | Iberian Peninsula | NP        | -0.8327 | 0.9390  |
| BGHZ2154  | Spain    | Iberian Peninsula | P         | 1.7161  | 0.2499  |
| BGHZ2546  | Spain    | Iberian Peninsula | NP        | -1.1624 | 0.7405  |
| BR11305   | Spain    | Iberian Peninsula | NP        | 0.0667  | -0.0430 |
| OI2705    | Spain    | Iberian Peninsula | NP        | 0.0527  | 1.9436  |
| PA145     | Spain    | Iberian Peninsula | NP        | -0.5721 | 0.1380  |
| PI30905   | Spain    | Iberian Peninsula | NP        | -0.7576 | 0.9654  |
| BPGV13044 | Portugal | Iberian Peninsula | <i>na</i> | 0.0478  | -0.6770 |
| BPGV13059 | Portugal | Iberian Peninsula | <i>na</i> | -0.0231 | -1.1700 |
| BPGV16049 | Portugal | Iberian Peninsula | <i>na</i> | 0.1108  | 0.1901  |
| BPGV16134 | Portugal | Iberian Peninsula | <i>na</i> | -0.1619 | -0.7993 |
| BPGV16135 | Portugal | Iberian Peninsula | <i>na</i> | 0.4197  | 1.5745  |
| BPGV16137 | Portugal | Iberian Peninsula | <i>na</i> | 0.0642  | -1.5937 |
| BPGV16184 | Portugal | Iberian Peninsula | <i>na</i> | -0.3617 | -0.1784 |
| BGHZ0106  | Spain    | Iberian Peninsula | P         | 1.5523  | 0.5226  |
| BGHZ0113  | Spain    | Iberian Peninsula | <i>na</i> | -0.2514 | 0.9498  |
| BGHZ0179  | Spain    | Iberian Peninsula | P         | -0.7215 | 0.0786  |
| BGHZ1375  | Spain    | Iberian Peninsula | P         | 1.1655  | 0.2085  |
| BGHZ1521  | Spain    | Iberian Peninsula | P         | 1.4961  | 1.6038  |
| BGHZ1753  | Spain    | Iberian Peninsula | P         | 1.6643  | -0.0481 |
| BGHZ2561  | Spain    | Iberian Peninsula | P         | -1.4771 | 0.0678  |
| BPGV07150 | Portugal | Iberian Peninsula | <i>na</i> | -0.0250 | -0.0817 |
| BPGV12297 | Portugal | Iberian Peninsula | <i>na</i> | -0.0941 | -0.6735 |
| BPGV12303 | Portugal | Iberian Peninsula | <i>na</i> | -0.2474 | 0.6874  |
| BPGV12306 | Portugal | Iberian Peninsula | <i>na</i> | -0.4286 | -0.4322 |
| BPGV12330 | Portugal | Iberian Peninsula | <i>na</i> | -0.3426 | 2.2467  |
| BPGV12331 | Portugal | Iberian Peninsula | <i>na</i> | -0.3696 | 0.0490  |
| BPGV12350 | Portugal | Iberian Peninsula | <i>na</i> | 0.0738  | -0.1164 |
| BPGV12351 | Portugal | Iberian Peninsula | <i>na</i> | -0.0021 | -0.8439 |
| BPGV12353 | Portugal | Iberian Peninsula | <i>na</i> | -0.0770 | 1.3930  |
| BPGV12354 | Portugal | Iberian Peninsula | <i>na</i> | 0.2288  | 0.4379  |
| BPGV12381 | Portugal | Iberian Peninsula | <i>na</i> | -0.0939 | 1.3355  |
| BPGV12387 | Portugal | Iberian Peninsula | <i>na</i> | -0.4616 | 0.2397  |
| BPGV12417 | Portugal | Iberian Peninsula | <i>na</i> | 0.0943  | -0.2953 |
| BPGV12438 | Portugal | Iberian Peninsula | <i>na</i> | -0.1409 | 0.8240  |
| BPGV12440 | Portugal | Iberian Peninsula | <i>na</i> | -0.4259 | -0.5871 |
| BPGV16393 | Portugal | Iberian Peninsula | <i>na</i> | -0.0504 | -0.5772 |
| CGN21475  | Portugal | Iberian Peninsula | NP        | -1.2594 | -1.3967 |
| BGHZ0206  | Spain    | Iberian Peninsula | NP        | -0.7532 | 1.8714  |
| CGN23293  | Spain    | Iberian Peninsula | NP        | -1.1687 | 1.5185  |
| BPGV12903 | Portugal | Iberian Peninsula | <i>na</i> | 0.1158  | 1.5608  |
| BPGV12904 | Portugal | Iberian Peninsula | <i>na</i> | -0.2719 | -0.0950 |

|          |                   |                     |    |         |         |
|----------|-------------------|---------------------|----|---------|---------|
| CAP1371  | Portugal          | Iberian Peninsula   | NP | -0.4714 | 0.1660  |
| CAP1539  | Portugal          | Iberian Peninsula   | NP | 0.0313  | -1.8218 |
| CGN16805 | Portugal          | Iberian Peninsula   | NP | -0.8868 | -0.0093 |
| CGN16897 | Portugal          | Iberian Peninsula   | NP | -1.5136 | 0.9166  |
| CGN16899 | Portugal          | Iberian Peninsula   | NP | -1.1395 | -1.2251 |
| CGN22161 | Portugal          | Iberian Peninsula   | NP | -0.8524 | 0.6233  |
| BGHZ0097 | Spain             | Iberian Peninsula   | P  | 0.3598  | 0.2322  |
| BGHZ0102 | Spain             | Iberian Peninsula   | NP | -0.6495 | 1.0257  |
| BGHZ0224 | Spain             | Iberian Peninsula   | NP | -1.3381 | 0.0035  |
| BGHZ0280 | Spain             | Iberian Peninsula   | P  | -1.1532 | -1.8042 |
| BGHZ0447 | Spain             | Iberian Peninsula   | NP | 1.2405  | -0.1912 |
| BGHZ0775 | Spain             | Iberian Peninsula   | NP | -0.6583 | 1.3669  |
| BGHZ0782 | Spain             | Iberian Peninsula   | P  | -0.5356 | -1.1939 |
| BGHZ0969 | Spain             | Iberian Peninsula   | P  | -1.0440 | -1.5168 |
| BGHZ1174 | Spain             | Iberian Peninsula   | NP | -1.2481 | 0.1520  |
| BGHZ0213 | Spain             | Iberian Peninsula   | NP | 0.1033  | 1.6332  |
| BGHZ0337 | Spain             | Iberian Peninsula   | NP | -1.1510 | 0.6828  |
| BGHZ3337 | Spain             | Iberian Peninsula   | NP | 1.4544  | 1.4996  |
| CAP1661  | Spain             | Iberian Peninsula   | NP | -0.1475 | 1.6375  |
| CGN17234 | Spain             | Iberian Peninsula   | NP | 1.0504  | 1.6964  |
| CGN17235 | Spain             | Iberian Peninsula   | P  | 1.0672  | -1.0490 |
| BGHZ0413 | Spain             | Iberian Peninsula   | NP | -0.2696 | 0.9513  |
| BGHZ0463 | Spain             | Iberian Peninsula   | NP | -0.8212 | -0.8484 |
| BGHZ5912 | Spain             | Iberian Peninsula   | NP | -1.2209 | 0.6621  |
| C431     | Spain             | Iberian Peninsula   | NP | -1.2681 | -0.8138 |
| BGHZ0282 | Spain             | Iberian Peninsula   | NP | 1.0640  | 1.2229  |
| BGHZ0338 | Spain             | Iberian Peninsula   | NP | -0.3093 | 1.1783  |
| BGHZ0971 | Spain             | Iberian Peninsula   | NP | -0.3618 | 0.8301  |
| CGN20507 | Spain             | Iberian Peninsula   | NP | -0.3006 | 1.7148  |
| BGHZ0082 | Spain             | Iberian Peninsula   | P  | -1.0243 | -1.2294 |
| BGHZ1114 | Spain             | Iberian Peninsula   | P  | 0.3481  | -1.6557 |
| CAP1049  | Albania           | Mediterranean Basin | NP | 0.8548  | 1.0897  |
| CAP1051  | Albania           | Mediterranean Basin | P  | 1.6981  | 0.1008  |
| CGN17172 | France            | Mediterranean Basin | NP | 0.8087  | 1.8655  |
| CGN21486 | France            | Mediterranean Basin | NP | -1.1969 | 1.4907  |
| CGN23239 | France            | Mediterranean Basin | NP | 0.9903  | -0.1447 |
| CAP242   | Italy             | Mediterranean Basin | NP | -0.4315 | 0.0018  |
| CAP68    | Italy             | Mediterranean Basin | NP | -1.3251 | -0.6018 |
| CAP913   | Italy             | Mediterranean Basin | NP | -1.0438 | 1.1821  |
| CGN16800 | Italy             | Mediterranean Basin | P  | -1.2873 | -1.3802 |
| CGN16881 | Italy             | Mediterranean Basin | P  | -1.2617 | 0.3213  |
| CGN16916 | Israel            | Mediterranean Basin | NP | -0.7177 | -0.2873 |
| CGN16917 | Israel            | Mediterranean Basin | NP | -0.6662 | 0.2914  |
| CGN21480 | Israel            | Mediterranean Basin | NP | -0.7064 | -0.1538 |
| CGN22825 | Israel            | Mediterranean Basin | P  | 1.5128  | 0.0076  |
| CAP607   | Libya             | Mediterranean Basin | na | -0.1559 | -0.3009 |
| CAP609   | Libya             | Mediterranean Basin | P  | 0.8743  | 0.4063  |
| CAP614   | Libya             | Mediterranean Basin | P  | 0.2639  | -1.1400 |
| CAP1538  | Tunisia           | Mediterranean Basin | P  | -0.6362 | 0.1754  |
| CAP977   | Tunisia           | Mediterranean Basin | P  | -0.3081 | -0.8422 |
| CAP979   | Tunisia           | Mediterranean Basin | P  | 0.4457  | 0.8833  |
| CGN16833 | Turkey            | Mediterranean Basin | NP | -0.8674 | -0.0631 |
| CGN17010 | Turkey            | Mediterranean Basin | NP | -0.8351 | -0.0521 |
| CGN17190 | Turkey            | Mediterranean Basin | NP | -0.6797 | 0.2694  |
| CGN17191 | Turkey            | Mediterranean Basin | NP | 1.5187  | 0.8229  |
| CGN22154 | Turkey            | Mediterranean Basin | P  | -0.9660 | 0.0406  |
| CGN24358 | Turkey            | Mediterranean Basin | P  | 2.1735  | 0.5872  |
| CAP1254  | Bulgaria          | Mediterranean Basin | P  | 0.9354  | -1.1778 |
| CAP491   | Bulgaria          | Mediterranean Basin | P  | 2.0776  | 0.4220  |
| CGN16808 | Bulgaria          | Mediterranean Basin | na | 0.0500  | 0.2571  |
| CGN17214 | Bulgaria          | Mediterranean Basin | NP | -1.1886 | -0.6324 |
| CGN21581 | Slovenia          | Mediterranean Basin | NP | 0.4703  | -0.0558 |
| CGN16807 | Hungary           | Mediterranean Basin | NP | -1.3876 | -0.6403 |
| CGN16817 | Hungary           | Mediterranean Basin | na | -1.0264 | -0.5113 |
| CGN17147 | Hungary           | Mediterranean Basin | NP | -1.2115 | -0.6580 |
| CGN17227 | Hungary           | Mediterranean Basin | na | -0.5466 | 0.1018  |
| CGN22127 | Hungary           | Mediterranean Basin | P  | 1.4388  | 0.2550  |
| CGN16835 | Former Yugoslavia | Mediterranean Basin | P  | 1.9945  | 1.0214  |
| CGN17193 | Former Yugoslavia | Mediterranean Basin | NP | 1.1341  | 1.0858  |
| CGN23235 | Former Yugoslavia | Mediterranean Basin | NP | -1.1451 | 1.1546  |

**Table S5** : List of accessions employed in this work. *Na* stands for not available.

| Accession | Country  | Collection site | Geographical Region | Biogeographic Province <sup>a</sup> | Population type <sup>b</sup> | Pungency <sup>c</sup> | Source <sup>d</sup> |
|-----------|----------|-----------------|---------------------|-------------------------------------|------------------------------|-----------------------|---------------------|
| BGHZ0082  | Spain    | Tenerife        | Iberian Peninsula   | CI                                  | land variety                 | P                     | BGHZ                |
| BGHZ0097  | Spain    | Madrid          | Iberian Peninsula   | CIM                                 | land variety                 | P                     | BGHZ                |
| BGHZ0102  | Spain    | Lerida          | Iberian Peninsula   | CIM                                 | land variety                 | NP                    | BGHZ                |
| BGHZ0106  | Spain    | Caceres         | Iberian Peninsula   | WIM                                 | land variety                 | P                     | BGHZ                |
| BGHZ0113  | Spain    | Badajoz         | Iberian Peninsula   | WIM                                 | land variety                 | <i>na</i>             | BGHZ                |
| BGHZ0179  | Spain    | Zamora          | Iberian Peninsula   | WIM                                 | land variety                 | P                     | BGHZ                |
| BGHZ0181  | Spain    | Vizcaya         | Iberian Peninsula   | EA                                  | land variety                 | P                     | BGHZ                |
| BGHZ0206  | Spain    | Huelva          | Iberian Peninsula   | CLWA                                | land variety                 | NP                    | BGHZ                |
| BGHZ0213  | Spain    | Mallorca        | Iberian Peninsula   | VPB                                 | land variety                 | NP                    | BGHZ                |
| BGHZ0224  | Spain    | La Rioja        | Iberian Peninsula   | CIM                                 | land variety                 | NP                    | BGHZ                |
| BGHZ0280  | Spain    | Toledo          | Iberian Peninsula   | CIM                                 | land variety                 | P                     | BGHZ                |
| BGHZ0282  | Spain    | Jaen            | Iberian Peninsula   | B                                   | land variety                 | NP                    | BGHZ                |
| BGHZ0284  | Spain    | Guipuzcoa       | Iberian Peninsula   | EA                                  | land variety                 | P                     | BGHZ                |
| BGHZ0337  | Spain    | Valencia        | Iberian Peninsula   | VPB                                 | land variety                 | NP                    | BGHZ                |
| BGHZ0338  | Spain    | Malaga          | Iberian Peninsula   | B                                   | land variety                 | NP                    | BGHZ                |
| BGHZ0413  | Spain    | Almeria         | Iberian Peninsula   | MA                                  | land variety                 | NP                    | BGHZ                |
| BGHZ0447  | Spain    | Teruel          | Iberian Peninsula   | CIM                                 | land variety                 | NP                    | BGHZ                |
| BGHZ0463  | Spain    | Murcia          | Iberian Peninsula   | MA                                  | land variety                 | NP                    | BGHZ                |
| BGHZ0775  | Spain    | Albacete        | Iberian Peninsula   | CIM                                 | land variety                 | NP                    | BGHZ                |
| BGHZ0782  | Spain    | Ciudad Real     | Iberian Peninsula   | CIM                                 | land variety                 | P                     | BGHZ                |
| BGHZ0969  | Spain    | Guadalajara     | Iberian Peninsula   | CIM                                 | land variety                 | P                     | BGHZ                |
| BGHZ0971  | Spain    | Granada         | Iberian Peninsula   | B                                   | land variety                 | NP                    | BGHZ                |
| BGHZ1109  | Spain    | Asturias        | Iberian Peninsula   | EA                                  | land variety                 | NP                    | BGHZ                |
| BGHZ1114  | Spain    | Las Palmas      | Iberian Peninsula   | CI                                  | land variety                 | P                     | BGHZ                |
| BGHZ1174  | Spain    | Zaragoza        | Iberian Peninsula   | CIM                                 | land variety                 | NP                    | BGHZ                |
| BGHZ1375  | Spain    | Avila           | Iberian Peninsula   | WIM                                 | land variety                 | P                     | BGHZ                |
| BGHZ1521  | Spain    | Caceres         | Iberian Peninsula   | WIM                                 | land variety                 | P                     | BGHZ                |
| BGHZ1753  | Spain    | Segovia         | Iberian Peninsula   | WIM                                 | land variety                 | P                     | BGHZ                |
| BGHZ2154  | Spain    | Cantabria       | Iberian Peninsula   | EA                                  | land variety                 | P                     | BGHZ                |
| BGHZ2546  | Spain    | Navarra         | Iberian Peninsula   | EA                                  | land variety                 | NP                    | BGHZ                |
| BGHZ2561  | Spain    | Leon            | Iberian Peninsula   | WIM                                 | land variety                 | P                     | BGHZ                |
| BGHZ3337  | Spain    | Ibiza           | Iberian Peninsula   | VPB                                 | land variety                 | NP                    | BGHZ                |
| BGHZ5912  | Spain    | Alicante        | Iberian Peninsula   | MA                                  | land variety                 | NP                    | BGHZ                |
| BR11305   | Spain    | Pontevedra      | Iberian Peninsula   | EA                                  | land variety                 | NP                    | CIAM                |
| C431      | Spain    | Murcia          | Iberian Peninsula   | MA                                  | land variety                 | NP                    | BGHZ                |
| CAP1661   | Spain    | Barcelona       | Iberian Peninsula   | VPB                                 | land variety                 | NP                    | IPK                 |
| CGN17234  | Spain    | Valencia        | Iberian Peninsula   | VPB                                 | land variety                 | NP                    | CGN                 |
| CGN17235  | Spain    | Castellon       | Iberian Peninsula   | VPB                                 | land variety                 | P                     | CGN                 |
| CGN20507  | Spain    | Córdoba         | Iberian Peninsula   | B                                   | land variety                 | NP                    | CGN                 |
| CGN23293  | Spain    | Cádiz           | Iberian Peninsula   | CLWA                                | land variety                 | NP                    | CGN                 |
| OI2705    | Spain    | Orense          | Iberian Peninsula   | EA                                  | land variety                 | NP                    | CIAM                |
| PA145     | Spain    | A Coruña        | Iberian Peninsula   | EA                                  | land variety                 | NP                    | CIAM                |
| PI30905   | Spain    | Lugo            | Iberian Peninsula   | EA                                  | land variety                 | NP                    | CIAM                |
| BPGV07150 | Portugal | Evora           | Iberian Peninsula   | WIM                                 | land variety                 | <i>na</i>             | BPGV                |
| BPGV12297 | Portugal | Braganca        | Iberian Peninsula   | WIM                                 | land variety                 | <i>na</i>             | BPGV                |
| BPGV12303 | Portugal | Braganca        | Iberian Peninsula   | WIM                                 | land variety                 | <i>na</i>             | BPGV                |
| BPGV12306 | Portugal | Braganca        | Iberian Peninsula   | WIM                                 | land variety                 | <i>na</i>             | BPGV                |
| BPGV12330 | Portugal | Braganca        | Iberian Peninsula   | WIM                                 | land variety                 | <i>na</i>             | BPGV                |
| BPGV12331 | Portugal | Braganca        | Iberian Peninsula   | WIM                                 | land variety                 | <i>na</i>             | BPGV                |
| BPGV12350 | Portugal | Braganca        | Iberian Peninsula   | WIM                                 | land variety                 | <i>na</i>             | BPGV                |
| BPGV12351 | Portugal | Braganca        | Iberian Peninsula   | WIM                                 | land variety                 | <i>na</i>             | BPGV                |
| BPGV12353 | Portugal | Braganca        | Iberian Peninsula   | WIM                                 | land variety                 | <i>na</i>             | BPGV                |
| BPGV12354 | Portugal | Braganca        | Iberian Peninsula   | WIM                                 | land variety                 | <i>na</i>             | BPGV                |
| BPGV12381 | Portugal | Braganca        | Iberian Peninsula   | WIM                                 | land variety                 | <i>na</i>             | BPGV                |
| BPGV12387 | Portugal | Braganca        | Iberian Peninsula   | WIM                                 | land variety                 | <i>na</i>             | BPGV                |
| BPGV12417 | Portugal | Braganca        | Iberian Peninsula   | WIM                                 | land variety                 | <i>na</i>             | BPGV                |
| BPGV12438 | Portugal | Braganca        | Iberian Peninsula   | WIM                                 | land variety                 | <i>na</i>             | BPGV                |
| BPGV12440 | Portugal | Braganca        | Iberian Peninsula   | WIM                                 | land variety                 | <i>na</i>             | BPGV                |
| BPGV12903 | Portugal | Aveiro          | Iberian Peninsula   | CLWA                                | land variety                 | <i>na</i>             | BPGV                |
| BPGV12904 | Portugal | Aveiro          | Iberian Peninsula   | CLWA                                | land variety                 | <i>na</i>             | BPGV                |
| BPGV13044 | Portugal | Guarda          | Iberian Peninsula   | EA                                  | land variety                 | <i>na</i>             | BPGV                |
| BPGV13059 | Portugal | Guarda          | Iberian Peninsula   | EA                                  | land variety                 | <i>na</i>             | BPGV                |
| BPGV16049 | Portugal | Guarda          | Iberian Peninsula   | EA                                  | land variety                 | <i>na</i>             | BPGV                |
| BPGV16134 | Portugal | Guarda          | Iberian Peninsula   | EA                                  | land variety                 | <i>na</i>             | BPGV                |
| BPGV16135 | Portugal | Guarda          | Iberian Peninsula   | EA                                  | land variety                 | <i>na</i>             | BPGV                |
| BPGV16137 | Portugal | Guarda          | Iberian Peninsula   | EA                                  | land variety                 | <i>na</i>             | BPGV                |
| BPGV16184 | Portugal | Guarda          | Iberian Peninsula   | EA                                  | land variety                 | <i>na</i>             | BPGV                |
| BPGV16393 | Portugal | Castelo Branco  | Iberian Peninsula   | WIM                                 | land variety                 | <i>na</i>             | BPGV                |
| CAP1371   | Portugal | Lisboa          | Iberian Peninsula   | CLWA                                | improved cultivar            | NP                    | IPK                 |
| CAP1539   | Portugal | Algarve         | Iberian Peninsula   | CLWA                                | land variety                 | NP                    | IPK                 |
| CGN16805  | Portugal | Oeiras          | Iberian Peninsula   | CLWA                                | breeders variety             | NP                    | CGN                 |
| CGN16897  | Portugal | Oeiras          | Iberian Peninsula   | CLWA                                | breeders variety             | NP                    | CGN                 |

|           |                   |                      |                     |      |                     |    |       |
|-----------|-------------------|----------------------|---------------------|------|---------------------|----|-------|
| CGN16899  | Portugal          | Oeiras               | Iberian Peninsula   | CLWA | breeders variety    | NP | CGN   |
| CGN21475  | Portugal          | Elvas                | Iberian Peninsula   | WIM  | breeders variety    | NP | CGN   |
| CGN22161  | Portugal          | Oeiras               | Iberian Peninsula   | CLWA | breeders variety    | NP | CGN   |
| CAP1049   | Albania           | Shkallnur            | Mediterranean Basin | -    | land variety        | NP | IPK   |
| CAP1051   | Albania           | Shkallnur            | Mediterranean Basin | -    | land variety        | P  | IPK   |
| CAP1254   | Bulgaria          | na                   | Mediterranean Basin | -    | improved cultivar   | P  | IPK   |
| CAP491    | Bulgaria          | na                   | Mediterranean Basin | -    | improved cultivar   | P  | IPK   |
| CGN16808  | Bulgaria          | na                   | Mediterranean Basin | -    | na                  | na | CGN   |
| CGN17214  | Bulgaria          | na                   | Mediterranean Basin | -    | na                  | NP | CGN   |
| CGN21581  | Slovenia          | na                   | Mediterranean Basin | -    | breeders variety    | NP | CGN   |
| CGN16835  | Former Yugoslavia | Ilovica              | Mediterranean Basin | -    | land variety        | P  | CGN   |
| CGN17193  | Former Yugoslavia | na                   | Mediterranean Basin | -    | breeders variety    | NP | CGN   |
| CGN23235  | Former Yugoslavia | na                   | Mediterranean Basin | -    | na                  | NP | CGN   |
| CGN17172  | France            | na                   | Mediterranean Basin | -    | breeders variety    | NP | CGN   |
| CGN21486  | France            | na                   | Mediterranean Basin | -    | breeders variety    | NP | CGN   |
| CGN23239  | France            | na                   | Mediterranean Basin | -    | breeders variety    | NP | CGN   |
| CGN16807  | Hungary           | na                   | Mediterranean Basin | -    | breeders variety    | NP | CGN   |
| CGN16817  | Hungary           | na                   | Mediterranean Basin | -    | breeders variety    | na | CGN   |
| CGN17147  | Hungary           | na                   | Mediterranean Basin | -    | breeders variety    | NP | CGN   |
| CGN17227  | Hungary           | na                   | Mediterranean Basin | -    | land variety        | na | CGN   |
| CGN22127  | Hungary           | na                   | Mediterranean Basin | -    | breeders variety    | P  | CGN   |
| CGN16916  | Israel            | na                   | Mediterranean Basin | -    | breeders variety    | NP | CGN   |
| CGN16917  | Israel            | na                   | Mediterranean Basin | -    | breeders variety    | NP | CGN   |
| CGN21480  | Israel            | na                   | Mediterranean Basin | -    | breeders variety    | NP | CGN   |
| CGN22825  | Israel            | na                   | Mediterranean Basin | -    | breeders variety    | P  | CGN   |
| CAP242    | Italy             | Aprigliano           | Mediterranean Basin | -    | land variety        | NP | IPK   |
| CAP68     | Italy             | Palinuro             | Mediterranean Basin | -    | land variety        | NP | IPK   |
| CAP913    | Italy             | Castellina Marittima | Mediterranean Basin | -    | land variety        | NP | IPK   |
| CGN16800  | Italy             | na                   | Mediterranean Basin | -    | breeders variety    | P  | CGN   |
| CGN16881  | Italy             | na                   | Mediterranean Basin | -    | breeders variety    | P  | CGN   |
| CAP607    | Libya             | Az Zighan            | Mediterranean Basin | -    | land variety        | na | IPK   |
| CAP609    | Libya             | Tmassah              | Mediterranean Basin | -    | land variety        | P  | IPK   |
| CAP614    | Libya             | Al Barkat            | Mediterranean Basin | -    | land variety        | P  | IPK   |
| CAP1538   | Tunisia           | Fondouk-El-Aouareb   | Mediterranean Basin | -    | land variety        | P  | IPK   |
| CAP977    | Tunisia           | Degache              | Mediterranean Basin | -    | land variety        | P  | IPK   |
| CAP979    | Tunisia           | Qibili               | Mediterranean Basin | -    | land variety        | P  | IPK   |
| CGN16833  | Turkey            | na                   | Mediterranean Basin | -    | land variety        | NP | CGN   |
| CGN17010  | Turkey            | na                   | Mediterranean Basin | -    | breeders variety    | NP | CGN   |
| CGN17190  | Turkey            | na                   | Mediterranean Basin | -    | breeders variety    | NP | CGN   |
| CGN17191  | Turkey            | na                   | Mediterranean Basin | -    | breeders variety    | NP | CGN   |
| CGN22154  | Turkey            | Mugla                | Mediterranean Basin | -    | Land variety        | P  | CGN   |
| CGN24358  | Turkey            | na                   | Mediterranean Basin | -    | na                  | P  | CGN   |
| C204      | Mexico            | na                   | Mexico              | -    | land variety        | P  | BGHZ  |
| C87       | Mexico            | Cihuatlán            | Mexico              | -    | land variety        | NP | BGHZ  |
| CGN21460  | Mexico            | Tabasco              | Mexico              | -    | land variety        | P  | CGN   |
| CGN21526  | Mexico            | Ciudad de México     | Mexico              | -    | wild                | NP | CGN   |
| CGN21527  | Mexico            | Puebla               | Mexico              | -    | wild                | P  | CGN   |
| CGN22102  | Mexico            | na                   | Mexico              | -    | land variety        | P  | CGN   |
| CGN22783  | Mexico            | Tabasco              | Mexico              | -    | wild                | P  | CGN   |
| CGN23254  | Mexico            | na                   | Mexico              | -    | land variety        | P  | CGN   |
| CGN24355  | Mexico            | Morelos              | Mexico              | -    | land variety        | NP | CGN   |
| PM647     | Mexico            | na                   | Mexico              | -    | wild                | P  | INRAE |
| CGN20808  | Bolivia           | na                   | Andean Region       | -    | wild                | P  | CGN   |
| CGN22155  | Bolivia           | Cochabamba           | Andean Region       | -    | na                  | NP | CGN   |
| PI213915  | Bolivia           | Cochabamba           | Andean Region       | -    | na                  | NP | USDA  |
| PI439212  | Bolivia           | na                   | Andean Region       | -    | na                  | P  | USDA  |
| PI543188  | Bolivia           | Cobija               | Andean Region       | -    | cultivated material | P  | USDA  |
| BGV005857 | Ecuador           | Loja                 | Andean Region       | -    | na                  | NP | COMAV |
| BGV005981 | Ecuador           | Azuay                | Andean Region       | -    | na                  | NP | COMAV |
| BGV006008 | Ecuador           | Chimborazo           | Andean Region       | -    | na                  | NP | COMAV |
| BGV006055 | Ecuador           | Quito                | Andean Region       | -    | na                  | NP | COMAV |
| PI241670  | Ecuador           | Guayaquil            | Andean Region       | -    | na                  | NP | USDA  |
| PI585238  | Ecuador           | Gonzanama            | Andean Region       | -    | na                  | P  | USDA  |
| PI585246  | Ecuador           | Arenillas            | Andean Region       | -    | na                  | P  | USDA  |
| BGV013687 | Peru              | Piura                | Andean Region       | -    | na                  | NP | COMAV |
| BGV013691 | Peru              | Salta                | Andean Region       | -    | na                  | NP | COMAV |
| CAP524    | Peru              | Lima                 | Andean Region       | -    | land variety        | P  | IPK   |

<sup>a</sup>EA = European Atlantic, BP = Betica Province, CIM = Central Iberian Mediterranean, CLWA = Coastal Lusitania and West Andalusia, MA = Murcia and Almeria, VPB = Valencia-Provence and Balearic, WIM = West Iberian Mediterranean, CI = Canary Islands

<sup>b</sup>Population type was assigned according to the information available at each genebank. Na stands for not available

<sup>c</sup>Pungency data were obtained from genebanks and previous work [59]. P = pungent, NP = non-pungent, Na stands for not available

<sup>d</sup>BGHZ=Vegetable Germplasm Bank of Zaragoza

BPGV=Portuguese Vegetal Germplasm Bank

COMAV= Instituto de Conservación y Mejora de la Agrodiversidad Valenciana,

CGN= Center for Genetic Resources,

IPK=Leibniz Institute of Plant Genetics and Crop Plant Research,

USDA= USDA - ARS - Plant Genetic Resources Conservation Unit

CIAM=Agricultural Research Center of Mabegondo

INRAE=French National Institute for Agriculture, Food, and Environment

**Table S6:** Conventional descriptors and digital traits measured with Tomato Analyzer v 3 software.

| Conventional descriptors           | Acronym | Units           |
|------------------------------------|---------|-----------------|
| Fruit weight                       | FWE     | g               |
| Fruit pedicel lenght               | FPL     | cm              |
| <b>Tomato Analyzer Descriptors</b> |         |                 |
| <b>Basic Measurements:</b>         |         |                 |
| Perimeter                          | P       | mm              |
| Area                               | A       | mm <sup>2</sup> |
| Width mid-height                   | WMH     | mm              |
| Maximum width                      | MW      | mm              |
| Height mid-width                   | HMW     | mm              |
| Maximum height                     | MH      | mm              |
| Curved height                      | CH      | mm              |
| <b>Fruit Shape Index:</b>          |         |                 |
| Fruit shape index external I       | FSIEI   |                 |
| Fruit shape index external II      | FSIEII  |                 |
| Curved fruit shape index           | CFSI    |                 |
| <b>Blockiness:</b>                 |         |                 |
| Proximal fruit blockiness          | PFB     |                 |
| Distal fruit blockiness            | DFB     |                 |
| Fruit shape triangle               | FST     |                 |
| <b>Homogeneity:</b>                |         |                 |
| Ellipsoid                          | E       |                 |
| Circular                           | C       |                 |
| Rectangular                        | R       |                 |
| <b>Proximal Fruit End Shape:</b>   |         |                 |
| Shoulder height                    | SH      |                 |
| Proximal angle micro               | PAMI    | degrees         |
| Proximal angle macro               | PAMA    | degrees         |
| Proximal indentation area          | PIA     |                 |
| <b>Distal Fruit End Shape:</b>     |         |                 |
| Distal angle micro                 | DAMI    | degrees         |
| Distal angle macro                 | DAMA    | degrees         |
| Distal indentation area            | DIA     |                 |
| Distal end protrusion              | DEP     |                 |
| <b>Asymmetry:</b>                  |         |                 |
| Obovoid                            | Ob      |                 |
| Ovoid                              | Ov      |                 |
| V.Asymmetry                        | VAs     |                 |
| H.Asymmetry.Ob                     | HAob    |                 |
| H.Asymmetry.Ov                     | HAov    |                 |
| Width widest position              | WWP     |                 |
| <b>Internal Eccentricity:</b>      |         |                 |
| Eccentricity                       | EC      |                 |
| Proximal eccentricity              | PEC     |                 |
| Distal eccentricity                | DEC     |                 |
| Fruit shape index internal         | FSII    |                 |
| Eccentricity area index            | ECA     |                 |
| <b>Lattitudinal Section:</b>       |         |                 |
| Lobedness degree                   | LD      |                 |
| Pericarp area                      | PA      |                 |
| Pericarp thickness                 | PT      |                 |



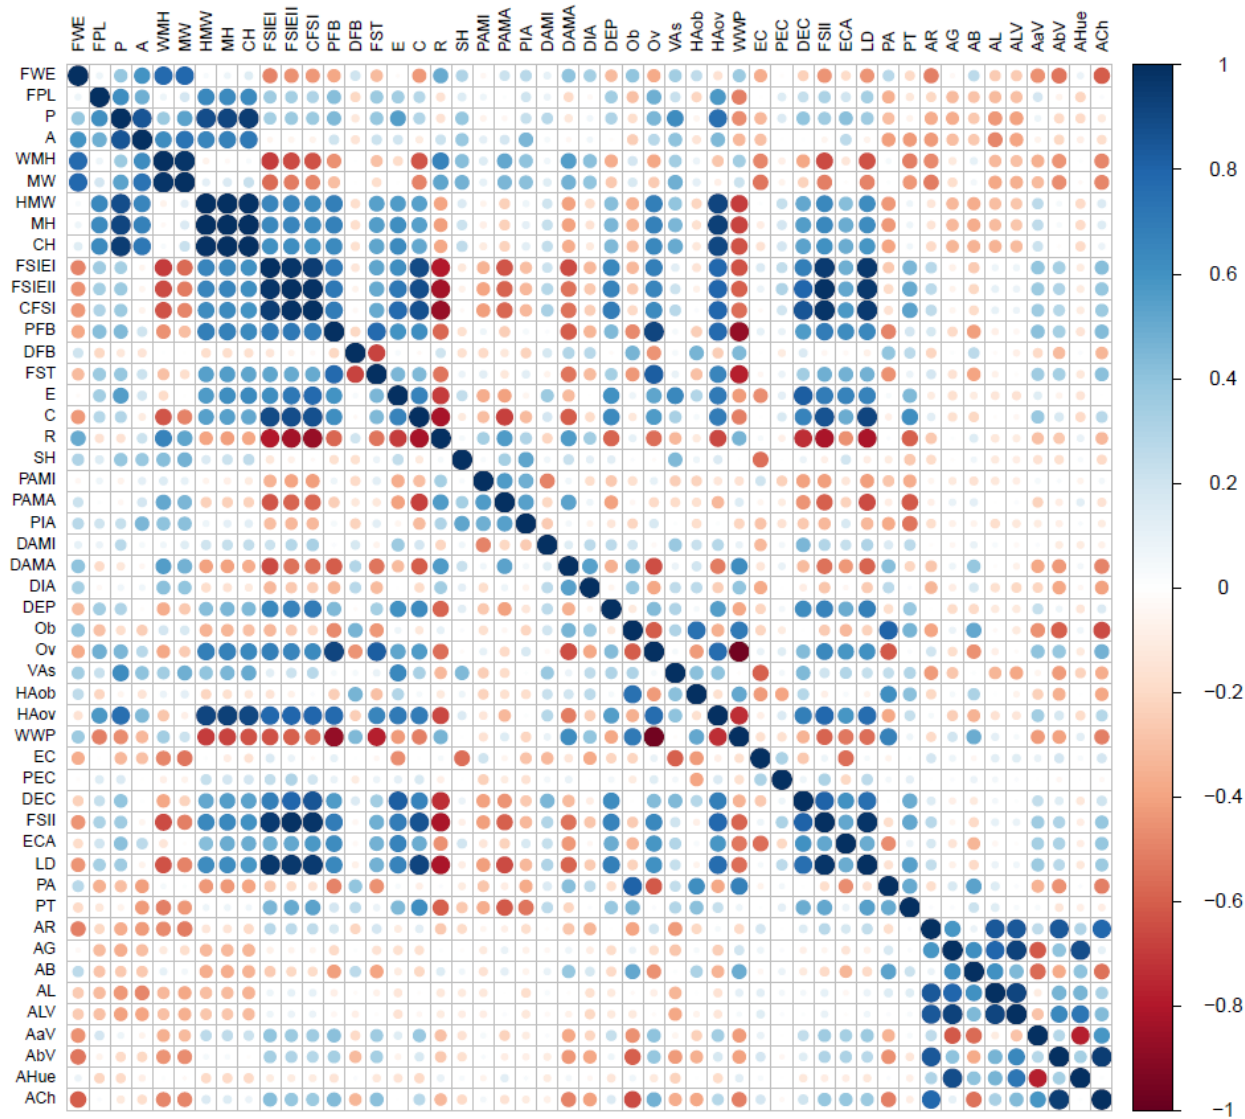

**Figure S1:** Pearson's rank correlation coefficients between pairs of traits. Color intensity (right scale) and the size of circles are proportional to the correlation coefficients. Significant and non-significant correlations are shown.

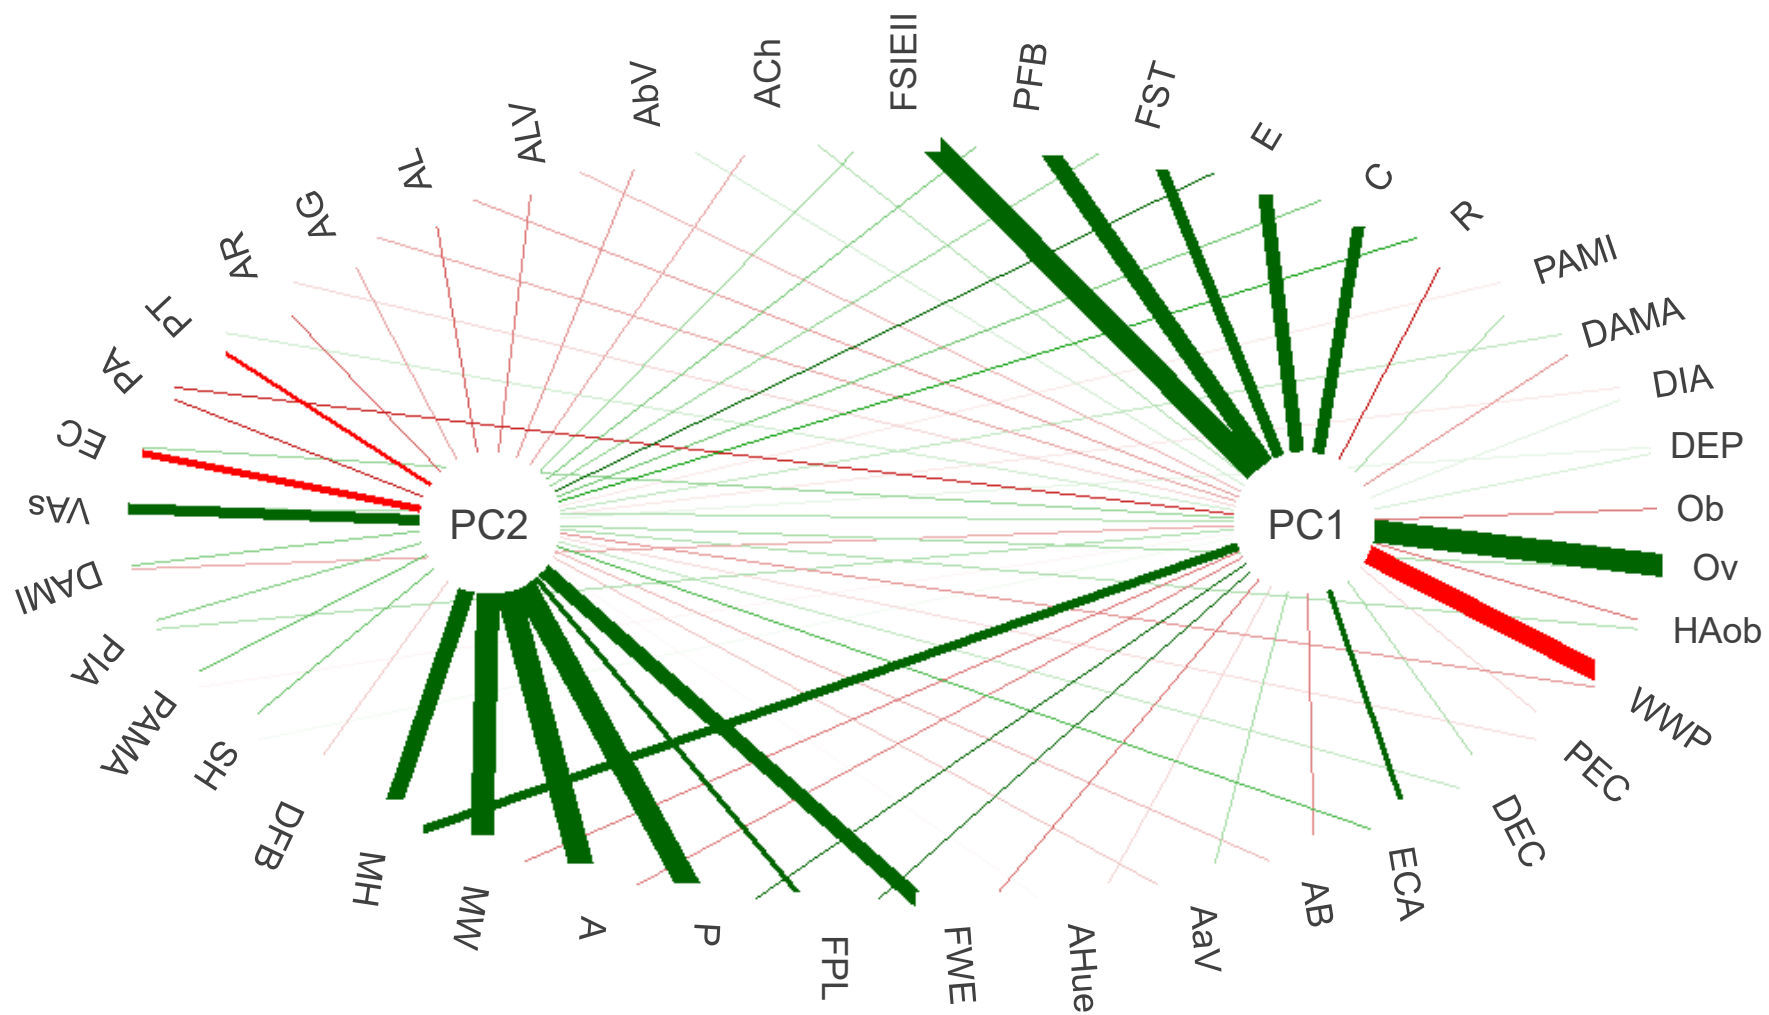

**Figure S2:** Contribution coefficients of each trait to the two Principal Components (PCs).

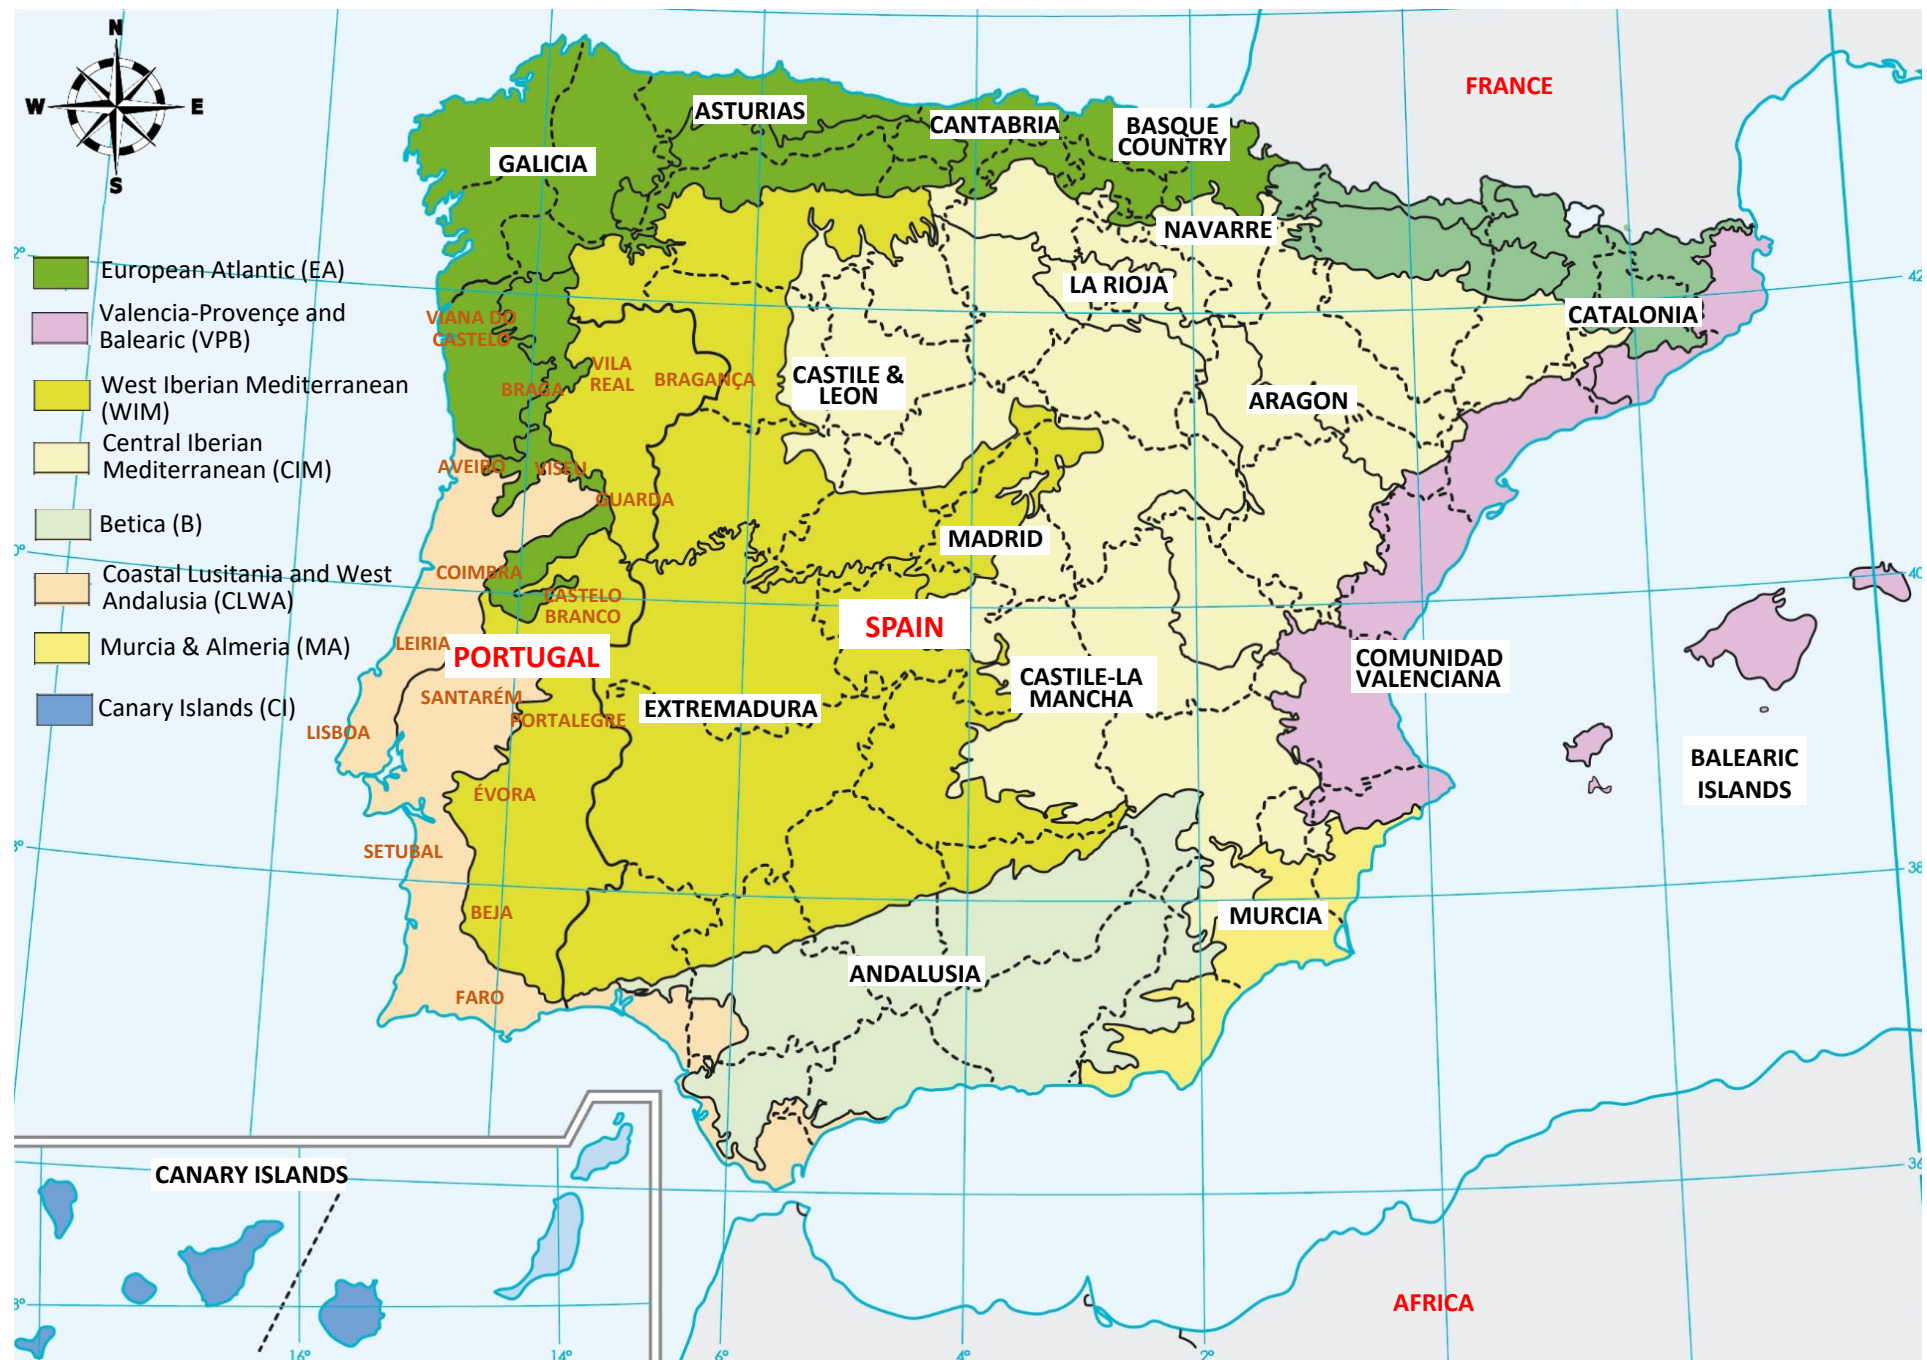

**Figure S3:** Biogeographic provinces of the Iberian Peninsula. Modified from Rivas-Martinez et al. [10]
